# Supplementary material for: Detection of cell‐free DNA fragmentation and copy number alterations in cerebrospinal fluid from glioma patients
Source: PubMed Central journal article supplement (PMC6284385; doi:10.15252/emmm.201809323), 2018-11-06
Supplement: EMMM-10-e9323-s001.pdf [file EMMM-10-e9323-s001.pdf]

## **Appendix file**

### **Detection of cell-free DNA fragmentation and copy number alterations in cerebrospinal fluid from glioma patients**

Florent Moulriere<sup>1,2,3,\*</sup>, Richard Mair<sup>1,2,4,\*</sup>, Dineika Chandrananda<sup>1,2</sup>, Francesco Marass<sup>1,2,5,6</sup>, Christopher G. Smith<sup>1,2</sup>, Jing Su<sup>1,2</sup>, James Morris<sup>1,2</sup>, Colin Watts<sup>4</sup>, Kevin Brindle<sup>1,2,7,#</sup>, Nitzan Rosenfeld<sup>1,2,#</sup>.

### **Table of contents**

**Appendix Figure S1:** SCNAs plots from the 13 CSF samples

**Appendix Figure S2:** Detailed SCNAs plot of the different tumor sub-parts and fluids (CSF, plasma, urine) available for patient GB1

**Appendix Figure S3:** Comparison of fragment length distributions for 13 glioma patient CSF samples.

**Appendix Table S1:** Summary table of the patients included in the study.

**Appendix Figure S1** SCNAs plots from the 13 CSF samples with SCNAs detected (A), and without SCNAs detected (B).

**A**

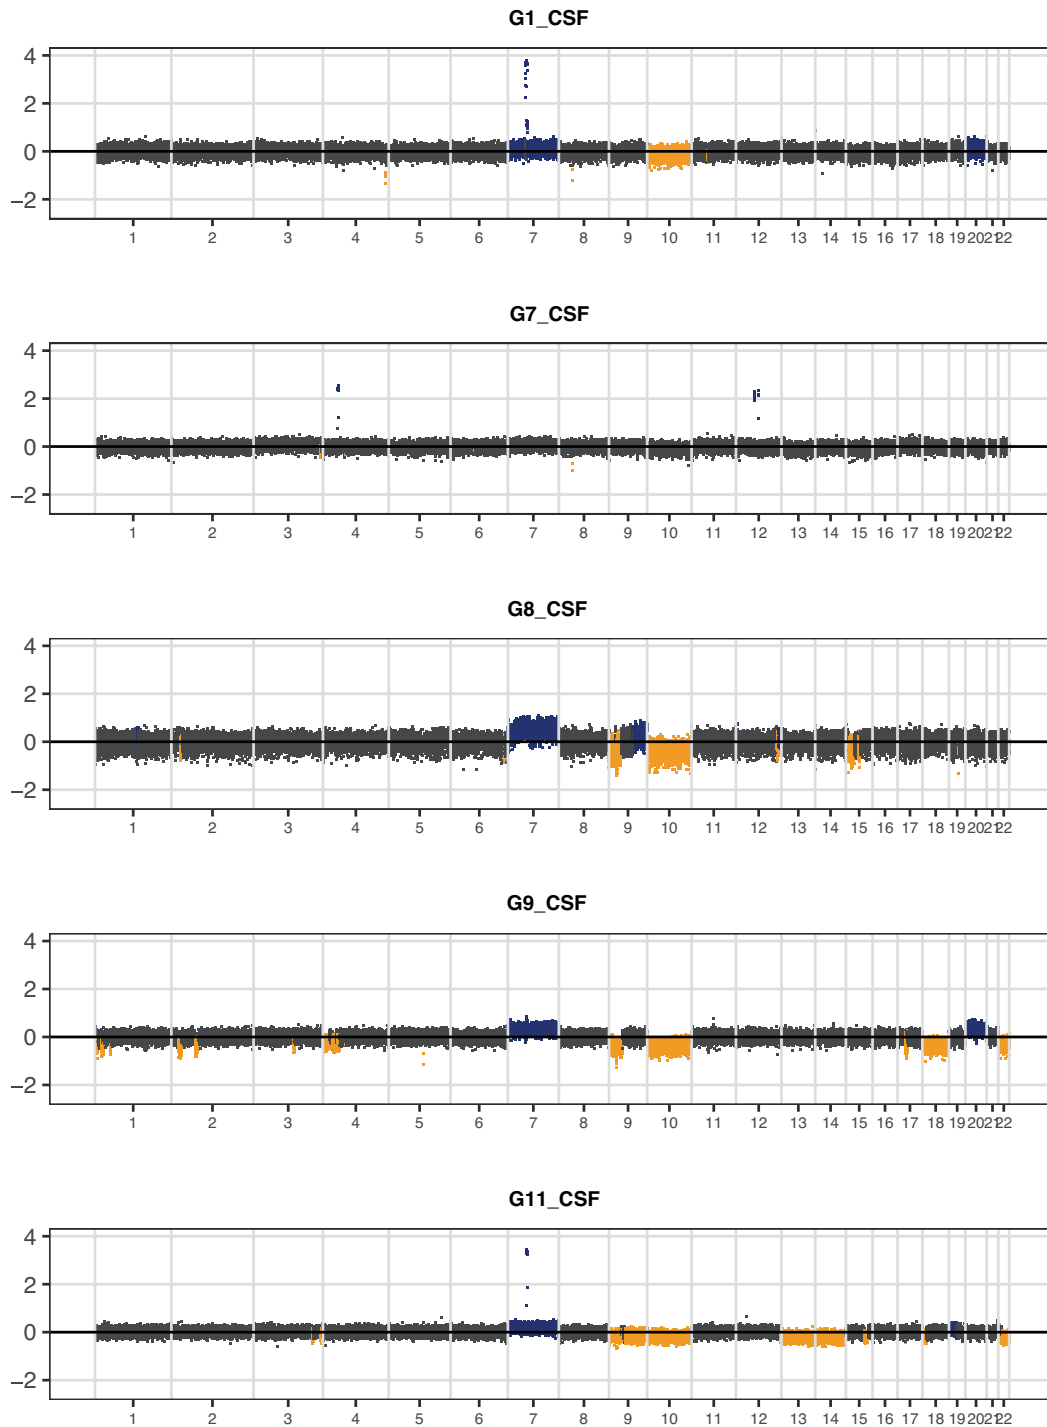

**B**

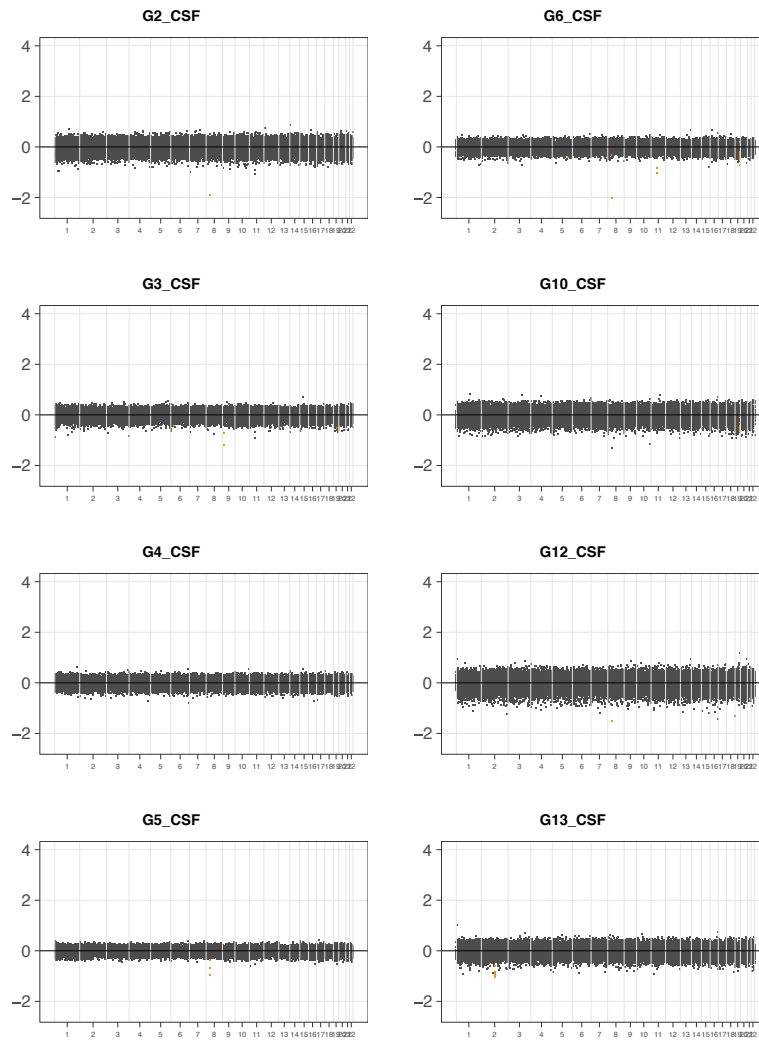

## Appendix Figure S2

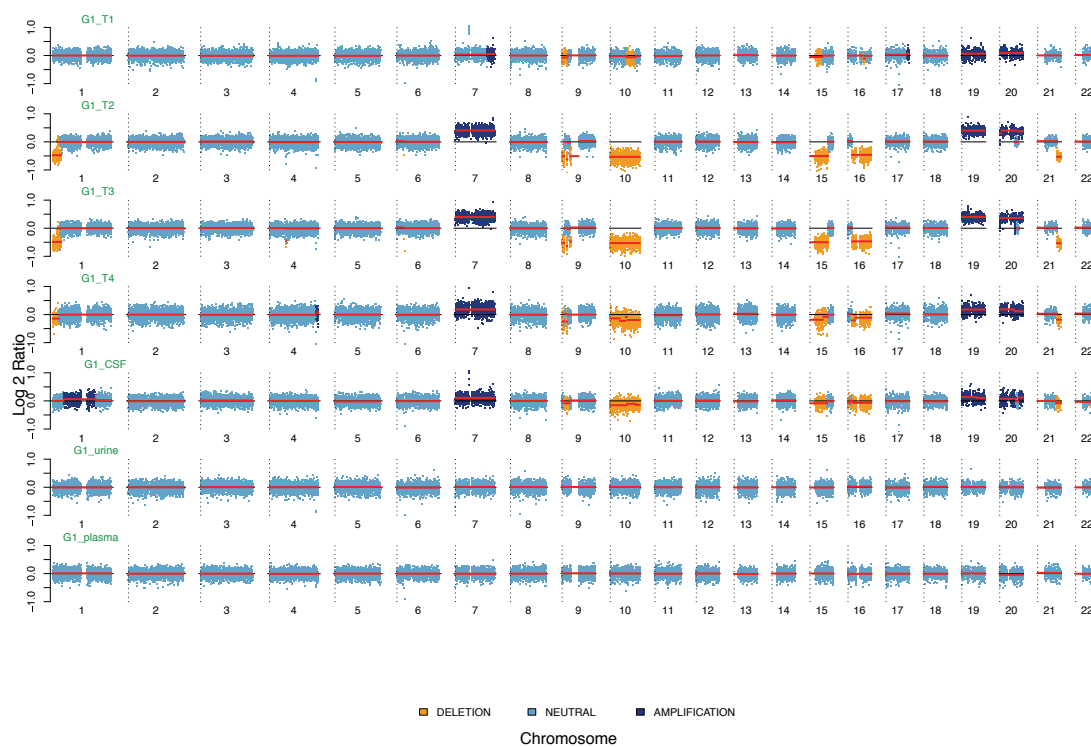

**Appendix figure S2** Detailed SCNAs plot of the different tumor sub-parts and fluids (CSF, plasma, urine) available for patient GB1. Amplification are in dark blue, deletion in orange and copy number neutral regions in light blue.

**Appendix figure S3** Comparison of fragment length distributions for 13 glioma patient CSF samples. The color of the size profile indicates whether SCNAs are detected (in blue) or non-detected (in red). Two patients have a solitary peak at ~145bp (G8 and G13) with one patient expressing a solitary peak at ~133bp (G1). Six patients display bimodal peaks at ~145 and ~167bp (G2, G6, G9, G5, G10 & G12). Four patients display peaks at ~167bp only (G11, G3, G4 & G7).

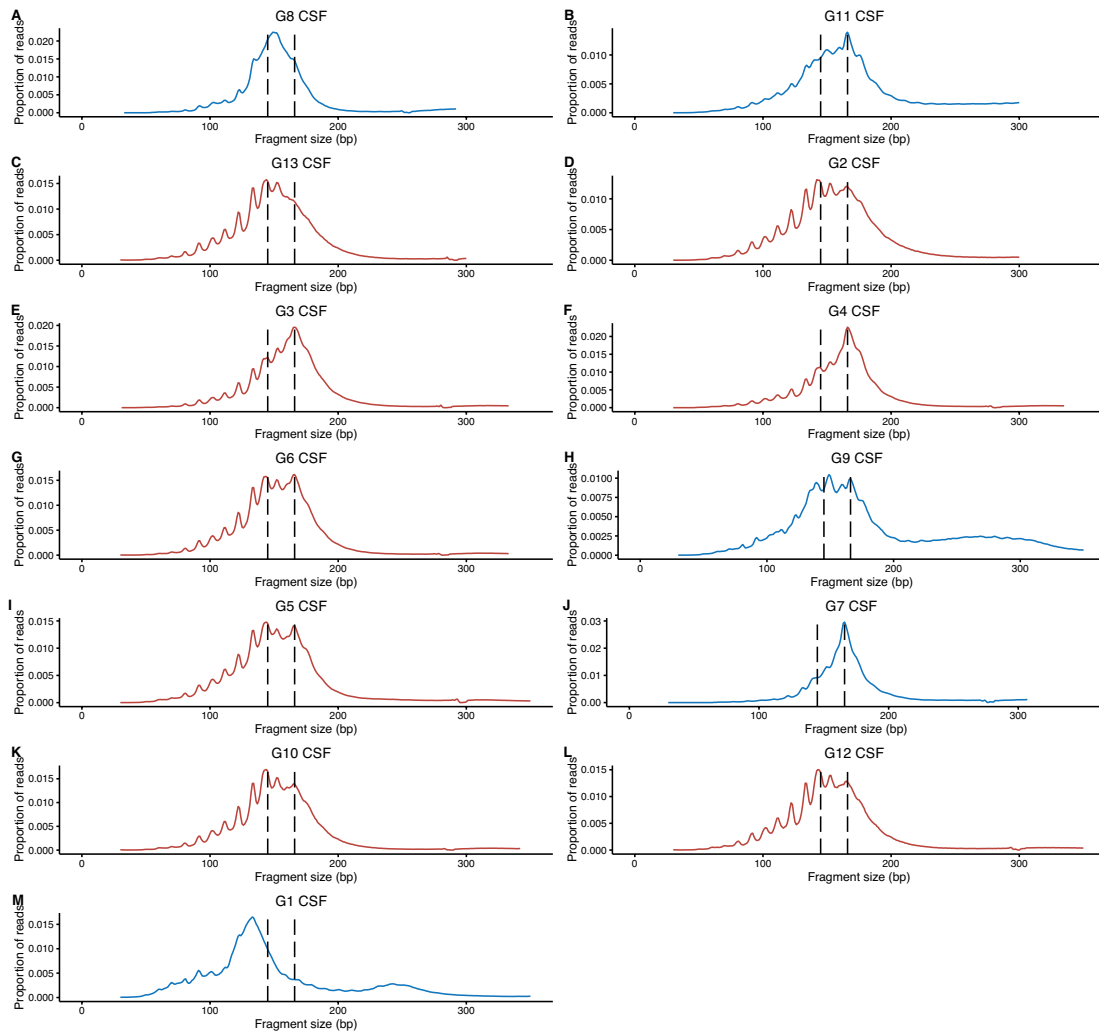

**Appendix Table 1** Summary table of the patients included in the study.

| patient | tumor type                   | tumor grade | tumor size (maximum dimension - mm) | cfDNA copies per mL | in contact with CSF | SCNA detected in CSF | ctDNA detected by fragmentation alone |
|---------|------------------------------|-------------|-------------------------------------|---------------------|---------------------|----------------------|---------------------------------------|
| G7      | Glioblastoma                 | 4           | 55                                  | 2446                | Y                   | 1                    | 1                                     |
| G9      | Glioblastoma                 | 4           | 44                                  | 1786                | Y                   | 1                    | 1                                     |
| G11     | Glioblastoma                 | 4           | 50                                  | 653                 | Y                   | 1                    | 1                                     |
| G5      | Glioblastoma                 | 4           | 64                                  | 384                 | Y                   | 0                    | 0                                     |
| G1      | Glioblastoma                 | 4           | 86                                  | 257                 | Y                   | 1                    | 1                                     |
| G2      | Glioblastoma                 | 4           | 39                                  | 256                 | Y                   | 0                    | 0                                     |
| G13     | Glioblastoma                 | 4           | 41                                  | 247                 | Y                   | 1                    | 0                                     |
| G12     | Anaplastic oligodendroglioma | 3           | 27                                  | 234                 | Y                   | 0                    | 0                                     |
| G10     | Oligodendroglioma            | 2           | 30                                  | 132                 | Y                   | 0                    | 0                                     |
| G8      | Glioblastoma                 | 4           | 33                                  | 102                 | N                   | 1                    | 1                                     |
| G3      | Diffuse astrocytoma          | 2           | 81                                  | 64                  | Y                   | 0                    | 0                                     |
| G4      | Glioblastoma                 | 4           | 35                                  | 64                  | Y                   | 0                    | 0                                     |
| G6      | Glioblastoma                 | 4           | 29                                  | 0                   | Y                   | 0                    | 0                                     |
